# Supplementary material for: Systemic adverse effects from inhaled corticosteroid use in asthma: a systematic review
Source: HighWire-hosted journal article supplement (doi:10.1136/bmjresp-2020-000756), 2020-12-01
Supplement: bmjresp-2020-000756supp001_data_supplement.pdf [file bmjresp-2020-000756supp001_data_supplement.pdf]

**Supplementary Figure 1.** PRISMA flowchart illustrating selection process of articles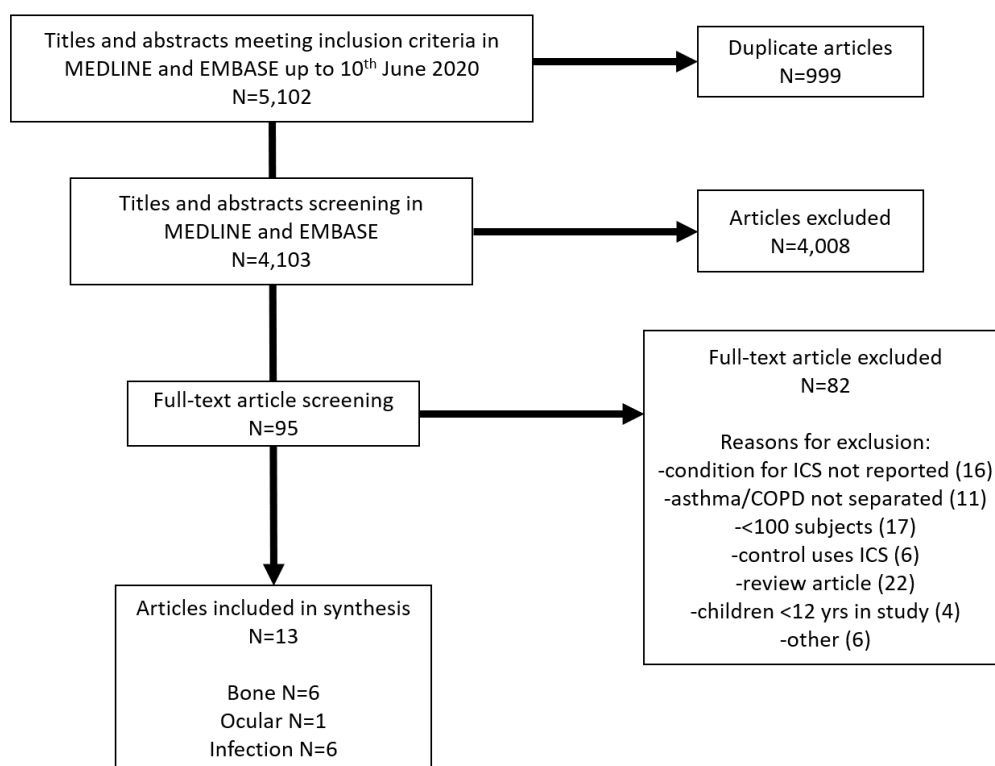

Supplementary Table 1. Literature search terms

| CONCEPTS                           | Search                                   | search terms                                                   |
|------------------------------------|------------------------------------------|----------------------------------------------------------------|
| Concept 1: Asthma                  | 1                                        | asthma.mp or Asthma/                                           |
| Concept 2: Inhaled corticosteroids | 2                                        | Inhaled corticosteroid mp.                                     |
|                                    | 3                                        | ics.mp                                                         |
|                                    | 4                                        | Inhal\$.mp.                                                    |
|                                    | 5                                        | Ciclesonide.mp.                                                |
|                                    | 6                                        | Fluticasone/ or fluticasone.mp.                                |
|                                    | 7                                        | Beclomethasone/ or beclomethasone.mp.                          |
|                                    | 8                                        | Budesonide/ or budesonide.mp.                                  |
|                                    | 9                                        | Mometasone furoate/ or mometasone.mp.                          |
|                                    | 10                                       | 4 AND (5 OR 6 OR 7 OR 8 OR 9)                                  |
|                                    | 11                                       | 2 OR 3 OR 9                                                    |
|                                    | 12                                       | 1 AND 10                                                       |
| Concept 3: Adverse effect          | 13                                       | adverse event\$                                                |
|                                    | 14                                       | adverse effect\$                                               |
|                                    | 15                                       | side effect\$                                                  |
|                                    | 16                                       | 13 OR 14 OR 15                                                 |
| Concept 4: Bone metabolism         | 17                                       | bone density.mp or Bone density/                               |
|                                    | 18                                       | bone mineral.mp or Bone mineral/                               |
|                                    | 19                                       | osteoporosis.mp or Osteoporosis/                               |
|                                    | 20                                       | osteopenia.mp or Osteopenia/                                   |
|                                    | 21                                       | fracture.mp or Fracture/                                       |
|                                    | 22                                       | 17 OR 18 OR 19 OR 20 OR 21 OR 22                               |
| Concept 5: Respiratory infection   | 23                                       | pneumonia.mp or Pneumonia/                                     |
|                                    | 24                                       | respiratory tract infection.mp or Respiratory tract infection/ |
|                                    | 25                                       | tuberculosis.mp or Tuberculosis/                               |
|                                    | 26                                       | mycobacter\$                                                   |
|                                    | 27                                       | Mycobacterium/                                                 |
|                                    | 28                                       | 23 OR 24 OR 25 OR 26 OR 27                                     |
| Concept 6: Ocular effects          | 29                                       | cataract.mp or Cataract/                                       |
|                                    | 30                                       | glaucoma.mp or Glaucoma/                                       |
|                                    | 31                                       | 29 OR 30                                                       |
| Concept 7: Diabetes                | 32                                       | diabetes.mp or Diabetes/                                       |
|                                    | 33                                       | dm.mp                                                          |
|                                    | 34                                       | dm\$.mp                                                        |
|                                    | 35                                       | 17 OR 18 OR 19                                                 |
| Final search                       | 1 AND 2 AND (16 OR 22 OR 28 OR 31 OR 35) |                                                                |

**Supplementary Table 2.** The PICO checklist.

|          |                     |                                                                                                                                                                                                                         |
|----------|---------------------|-------------------------------------------------------------------------------------------------------------------------------------------------------------------------------------------------------------------------|
| <b>P</b> | <b>Population</b>   | Adults with asthma                                                                                                                                                                                                      |
| <b>I</b> | <b>Intervention</b> | Inhaled corticosteroids                                                                                                                                                                                                 |
| <b>C</b> | <b>Comparison</b>   | Adults with or without asthma, that do not use inhaled corticosteroids                                                                                                                                                  |
| <b>O</b> | <b>Outcome</b>      | 1. Respiratory infections (pneumonia or mycobacterial infection)<br>2. Ocular disorders (cataract or glaucoma)<br>3. Bone mineral loss (bone density or fracture)<br>4. Diabetes (new diagnosis or worsening glycaemia) |

**Supplementary Table 3a.** Inclusion and exclusion criteria of trials with bone density as an outcome

| Primary author            | Tattersfield, A                                                                                                                                                                                                                                                                                                                                                                                                                                                                                                                                               | Kemp, J                                                                                                                                                                                                                                                                                                                                                                                                                                                                                               |
|---------------------------|---------------------------------------------------------------------------------------------------------------------------------------------------------------------------------------------------------------------------------------------------------------------------------------------------------------------------------------------------------------------------------------------------------------------------------------------------------------------------------------------------------------------------------------------------------------|-------------------------------------------------------------------------------------------------------------------------------------------------------------------------------------------------------------------------------------------------------------------------------------------------------------------------------------------------------------------------------------------------------------------------------------------------------------------------------------------------------|
| Year                      | 2001                                                                                                                                                                                                                                                                                                                                                                                                                                                                                                                                                          | 2004                                                                                                                                                                                                                                                                                                                                                                                                                                                                                                  |
| <b>Inclusion criteria</b> | <ul style="list-style-type: none"> <li>- relatively mild asthma and pre-bronchodilator FEV1 of 65% predicted or above</li> <li>- taking a B2 agonist only and no corticosteroid treatment (by any route) during the previous 3 months</li> <li>- no more than 1 month of treatment with oral corticosteroids in the previous year or ICS or nasal corticosteroids in the previous 6 months</li> <li>- at least 4 puffs of SABA and showing less than 25% variability in morning PEF during the last 7 days of the run in period with complete data</li> </ul> | <ul style="list-style-type: none"> <li>- not pregnant and non-lactating</li> <li>- premenopausal or using defined contraception</li> <li>- at least 6 month history of stable and mild asthma</li> <li>- normal stimulated cortisol response</li> <li>- normal BMD on screening</li> <li>- absence of glaucoma, posterior subcapsular cataract or blindness</li> <li>- FEV1 of 50%-100% predicted</li> <li>- no CS use for 1 month prior</li> <li>- less than 4 weeks lifetime oral CS use</li> </ul> |
| <b>Exclusion criteria</b> | <ul style="list-style-type: none"> <li>- any other medical conditions</li> <li>- taking drugs known to affect BMD</li> <li>- required more than 2 weeks of bed rest in the previous 6 months</li> <li>- pregnant, lactating or at risk of becoming pregnant</li> </ul>                                                                                                                                                                                                                                                                                        | <ul style="list-style-type: none"> <li>- excluded medications</li> <li>- presence of glaucoma, posterior subcapsular cataract or blindness</li> <li>- reversal of normal nocturnal sleeping hours</li> <li>- alterations in body weight (anorexia; morbid obesity; recent unexplained weight loss of &gt;25%)</li> <li>- substance abuse</li> </ul>                                                                                                                                                   |

**Supplementary Table 3b.** Inclusion and exclusion criteria of observational studies with bone density as an outcome

| Primary author            | Sasagawa, M                            | Sosa, M                                                                                                                                         | Langhammer, A                                                                                                                | Israel, E                                                                                                                                                                                                                                                                                                                                                                                                                                                                                                                                                                                                                              |
|---------------------------|----------------------------------------|-------------------------------------------------------------------------------------------------------------------------------------------------|------------------------------------------------------------------------------------------------------------------------------|----------------------------------------------------------------------------------------------------------------------------------------------------------------------------------------------------------------------------------------------------------------------------------------------------------------------------------------------------------------------------------------------------------------------------------------------------------------------------------------------------------------------------------------------------------------------------------------------------------------------------------------|
| Year                      | 2011                                   | 2006                                                                                                                                            | 2004                                                                                                                         | 2001                                                                                                                                                                                                                                                                                                                                                                                                                                                                                                                                                                                                                                   |
| <b>Inclusion criteria</b> | -Bronchial asthma<br>-Hospital patient | Cases:<br>- women<br>- bronchial asthma<br>-treated with ICS $\geq 1$ year<br><br>Controls:<br>- weight-matched women                           | -Self reported previous or current asthma<br>-Use of asthma medication<br>-Asthma-related symptoms during the last 12 months | Physician diagnosed asthma $\geq 10$ menstrual periods in the preceding year.                                                                                                                                                                                                                                                                                                                                                                                                                                                                                                                                                          |
| <b>Exclusion criteria</b> | Oral steroid use                       | Cases:<br>- not received oral or parenteral steroids.<br><br>Controls:<br>- no asthma<br>- no steroids of any form<br>- weight matched to cases | N/A                                                                                                                          | - men<br>- disease affecting bone turnover<br>- taking any drugs known to influence bone metabolism<br>- smoked in the preceding year<br>- abnormal serum thyrotropin concentrations<br>- low 25-hydroxyvitamin D concentrations<br>- high serum parathyroid hormone concentrations<br>- high serum follicle-stimulating hormone concentrations<br>- 24-hour urinary calcium excretion of more than 250 mg (6.2 mmol) or low bone density (z score, $-2$ or less)<br>- received $>2$ short courses of oral or parenteral glucocorticoids in the preceding year or any oral or parenteral glucocorticoids in the preceding three months |

**Supplementary Table 3c.** Inclusion and exclusion criteria of observational studies with respiratory infection as an outcome

| Primary author            | McKeever, T                                                                                                                                             | Qian, C. J                                                                                                                                                            | Ekbom, E                     | Kim M-H                                                                                                                                                                                                                     | Lee, C. H                                                                                                                                                                                            | Brode, S. K                                                                                                                          |
|---------------------------|---------------------------------------------------------------------------------------------------------------------------------------------------------|-----------------------------------------------------------------------------------------------------------------------------------------------------------------------|------------------------------|-----------------------------------------------------------------------------------------------------------------------------------------------------------------------------------------------------------------------------|------------------------------------------------------------------------------------------------------------------------------------------------------------------------------------------------------|--------------------------------------------------------------------------------------------------------------------------------------|
| Year                      | 2013                                                                                                                                                    | 2017                                                                                                                                                                  | 2019                         | 2019                                                                                                                                                                                                                        | 2013                                                                                                                                                                                                 | 2017                                                                                                                                 |
| <b>Inclusion criteria</b> | Recorded diagnosis after Jan 2004                                                                                                                       | >1 prescription for a respiratory medication between Jan 1990-Dec 2007                                                                                                | Responded to RHINE II survey | - at least 2 outpatient visits<br>- treated with asthma medications or received inpatient care<br>- using more than 1 systemic corticosteroid and at least 1 asthma medication at the time of the outpatient clinic visits. | -Prescriptions for inhaled respiratory medications for >30 days<br>-No history of recent TB                                                                                                          | - >1 prescription for any inhaled B-agonist, inhaled anticholinergic, ICS, oral corticosteroid or methylxanthine during study period |
| <b>Exclusion criteria</b> | Cases:<br>- COPD, bronchiectasis<br>- changed inhaler in previous 90 days<br>- prescribed >1 type of ICS inhaler on same day<br><br>Controls:<br>- COPD | -Prevalent users of respiratory medications<br>-Less than 1 year of RAMQ drug coverage prior to cohort entry<br>-Hospital admission for COPD<br>-Data inconsistencies | N/A                          | N/A                                                                                                                                                                                                                         | -Previous prescriptions for inhaled medication for >30 days during the year prior to initiation date<br>-Any ICD-10 diagnosis of TB within 1yr of index date<br>-No matched controls<br>-Age unknown | N/A                                                                                                                                  |

**Supplementary Table 3d.** Inclusion and exclusion criteria of observational studies with an ocular disorder as an outcome

| Primary author            | Smeeth, L                                                                                                                                                                                                                               |
|---------------------------|-----------------------------------------------------------------------------------------------------------------------------------------------------------------------------------------------------------------------------------------|
| Year                      | 2003                                                                                                                                                                                                                                    |
| <b>Inclusion criteria</b> | -First diagnosis of cataracts while registered with a practice participating in CPRD<br>-Date of first diagnosis of cataract was the index date<br>-All participants have at least 180 days of observation period before the index date |
| <b>Exclusion criteria</b> | Diagnosis of congenital or traumatic cataracts                                                                                                                                                                                          |
